# Supplementary material for: Chemical Composition of Turmeric (Curcuma longa L.) Ethanol Extract and Its Antimicrobial Activities and Free Radical Scavenging Capacities
Source: MDPI journal article supplement (doi:10.3390/foods13101550), 2024-05-16
Supplement: s1 [file s1]

Supplementary Figure S1

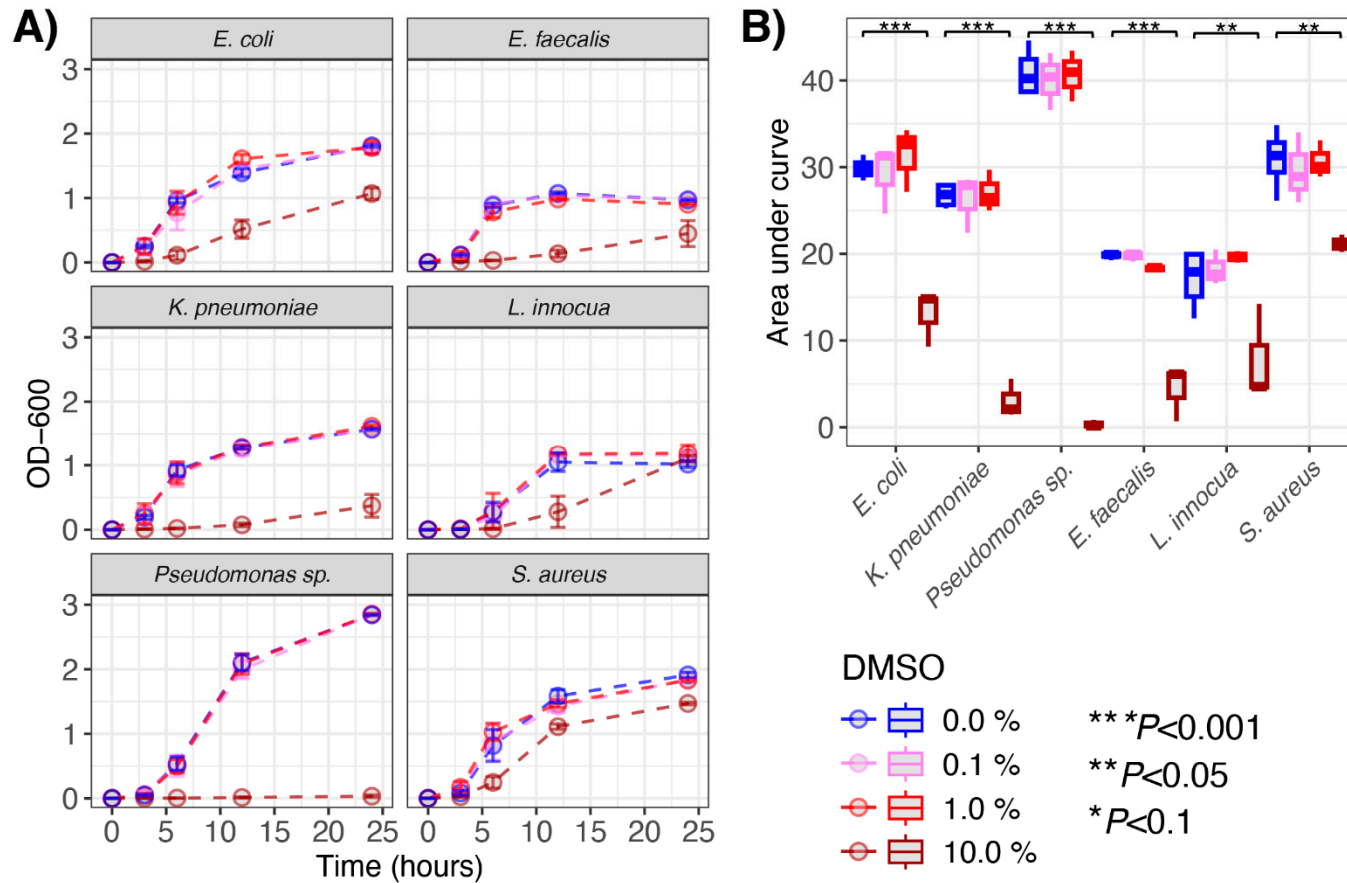

**Supplementary Figure S1. Effects of DMSO on bacterial growth.** Panel A shows the growth curves and Panel B shows area under the curve with '\*' and '\*\*' for inhibition relative to the controls (0%).
